# Supplementary material
Source: PubMed Central journal article supplement (PMC4298543)
Supplement: JCM.01963-14_zjm999093982so1.pdf [file JCM.01963-14_zjm999093982so1.pdf]

**Supplemental.** A total of 51 isolates were analyzed by partial *gyrB*/*rpoB* sequencing and conventional biochemical methods for species identification.

| Name of isolate | Name of partial <i>gyrB</i> sequence | Acc. no. of partial <i>gyrB</i> sequence | Name of partial <i>rpoB</i> sequence | Acc. No. of partial <i>rpoB</i> sequence | Species identification based on partial <i>rpoB/gyrB</i> sequence | Species identification based on conventional biochemical methods |
|-----------------|--------------------------------------|------------------------------------------|--------------------------------------|------------------------------------------|-------------------------------------------------------------------|------------------------------------------------------------------|
| DK-A.veronii-1  | gyrB1                                | KJ747109                                 | rpoB1*                               | KJ747157                                 | <i>A. veronii</i>                                                 | <i>A. hydrophila</i>                                             |
| DK-A.veronii-2  | gyrB2                                | KJ747110                                 | rpoB2*                               | KJ747158                                 | <i>A. veronii</i>                                                 | <i>A. veronii</i>                                                |
| DK-A.besti-3    | gyrB3                                | KJ747111                                 | rpoB3                                | KJ747159                                 | <i>A. bestiarum</i>                                               | <i>A. caviae</i>                                                 |
| DK-A.media-5    | gyrB5                                | KJ747112                                 | rpoB5                                | KJ747160                                 | <i>A. media</i>                                                   | <i>A. caviae</i>                                                 |
| DK-A.media-6    | gyrB6                                | KJ747113                                 | rpoB6*                               | KJ747161                                 | <i>A. media</i>                                                   | <i>A. caviae</i>                                                 |
| DK-A.caviae-7   | gyrB7                                | KJ747114                                 | rpoB7                                | KJ747162                                 | <i>A. caviae</i>                                                  | <i>A. caviae</i>                                                 |
| DK-A.media-9    | gyrB9                                | KJ747115                                 | rpoB6*                               | KJ747161                                 | <i>A. media</i>                                                   | <i>A. caviae</i>                                                 |
| DK-A.caviae-10  | gyrB10                               | KJ747116                                 | rpoB10*                              | KJ747163                                 | <i>A. caviae</i>                                                  | <i>A. caviae</i>                                                 |
| DK-A.veronii-11 | gyrB11                               | KJ747117                                 | rpoB11*                              | KJ747164                                 | <i>A. veronii</i>                                                 | <i>A. caviae</i>                                                 |
| DK-A.caviae-13  | gyrB13                               | KJ747118                                 | rpoB10*                              | KJ747163                                 | <i>A. caviae</i>                                                  | <i>A. caviae</i>                                                 |
| DK-A.caviae-14  | gyrB14                               | KJ747119                                 | rpoB14                               | KJ747165                                 | <i>A. caviae</i>                                                  | <i>A. caviae</i>                                                 |
| DK-A.caviae-15  | gyrB15                               | KJ747120                                 | rpoB10*                              | KJ747163                                 | <i>A. caviae</i>                                                  | <i>A. caviae</i>                                                 |
| DK-A.caviae-16  | gyrB16                               | KJ747121                                 | rpoB16*                              | KJ775031                                 | <i>A. caviae</i>                                                  | <i>A. caviae</i>                                                 |
| DK-A.hydroph-17 | gyrB17                               | KJ747122                                 | rpoB17                               | KJ747166                                 | <i>A. hydrophila</i>                                              | <i>A. caviae</i>                                                 |
| DK-A.caviae-18  | gyrB18                               | KJ747123                                 | rpoB16*                              | KJ775031                                 | <i>A. caviae</i>                                                  | <i>A. caviae</i>                                                 |
| DK-A.caviae-19  | gyrB19*                              | KJ747124                                 | rpoB19*                              | KJ747167                                 | <i>A. caviae</i>                                                  | <i>A. caviae</i>                                                 |
| DK-A.media-20   | gyrB20                               | KJ747125                                 | rpoB20                               | KJ747168                                 | <i>A. media</i>                                                   | <i>A. caviae</i>                                                 |
| DK-A.caviae-21  | gyrB21                               | KJ747126                                 | rpoB10*                              | KJ747163                                 | <i>A. caviae</i>                                                  | <i>A. caviae</i>                                                 |
| DK-A.caviae-22  | gyrB19*                              | KJ747124                                 | rpoB16*                              | KJ775031                                 | <i>A. caviae</i>                                                  | <i>A. caviae</i>                                                 |

|                 |         |          |         |          |                                      |                      |
|-----------------|---------|----------|---------|----------|--------------------------------------|----------------------|
| DK-A.caviae-23  | gyrB23  | KJ747127 | rpoB23  | KJ747169 | <i>A. caviae</i>                     | <i>A. caviae</i>     |
| DK-A.veronii-25 | gyrB25  | KJ747128 | rpoB1*  | KJ747157 | <i>A. veronii</i>                    | <i>A. hydrophila</i> |
| DK-A.veronii-26 | gyrB26  | KJ747129 | rpoB26  | KJ747170 | <i>A. veronii</i>                    | <i>A. hydrophila</i> |
| DK-A.veronii-27 | gyrB27  | KJ747130 | rpoB2*  | KJ747158 | <i>A. veronii</i>                    | <i>A. hydrophila</i> |
| DK-A.hydrop-28  | gyrB28  | KJ747131 | rpoB28  | KJ747171 | <i>A. hydrophila</i>                 | <i>A. hydrophila</i> |
| DK-A.caviae-30  | gyrB30  | KJ747132 | rpoB30  | KJ747172 | <i>A. caviae</i>                     | <i>A. hydrophila</i> |
| DK-A.veronii-31 | gyrB31  | KJ747133 | rpoB31  | KJ747173 | <i>A. veronii</i>                    | <i>A. hydrophila</i> |
| DK-A.veronii-32 | gyrB32  | KJ747134 | rpoB32  | KJ747174 | <i>A. veronii</i>                    | <i>A. hydrophila</i> |
| DK-A.veronii-34 | gyrB34  | KJ747135 | rpoB34  | KJ747175 | <i>A. veronii</i>                    | <i>A. hydrophila</i> |
| DK-A.veronii-36 | gyrB36  | KJ747136 | rpoB1*  | KJ747157 | <i>A. veronii</i>                    | <i>A. hydrophila</i> |
| DK-A.veronii-37 | gyrB37  | KJ747137 | rpoB37  | KJ747176 | <i>A. veronii</i>                    | <i>A. hydrophila</i> |
| DK-A.veronii-38 | gyrB38  | KJ747138 | rpoB38  | KJ747177 | <i>A. veronii</i>                    | <i>A. hydrophila</i> |
| DK-A.veronii-39 | gyrB39  | KJ747139 | rpoB2*  | KJ747158 | <i>A. veronii</i>                    | <i>A. hydrophila</i> |
| DK-A.veronii-40 | gyrB40* | KJ747140 | rpoB11* | KJ747164 | <i>A. veronii</i>                    | <i>A. hydrophila</i> |
| DK-A.sp-41      | gyrB41  | KJ747141 | rpoB41  | KJ747178 | <i>A. salmonicida/<br/>encheleia</i> | <i>A. hydrophila</i> |
| DK-A.veronii-42 | gyrB42  | KJ747142 | rpoB42  | KJ747179 | <i>A. veronii</i>                    | <i>A. hydrophila</i> |
| DK-A.veronii-45 | gyrB45  | KJ747143 | rpoB45* | KJ775032 | <i>A. veronii</i>                    | <i>A. hydrophila</i> |
| DK-A.hydrop-46  | gyrB46  | KJ747144 | rpoB46  | KJ747180 | <i>A. hydrophila</i>                 | <i>A. hydrophila</i> |
| DK-A.veronii-47 | gyrB40* | KJ747140 | rpoB2*  | KJ747158 | <i>A. veronii</i>                    | <i>A. hydrophila</i> |
| DK-A.veronii-49 | gyrB49  | KJ747145 | rpoB1*  | KJ747157 | <i>A. veronii</i>                    | <i>A. hydrophila</i> |
| DK-A.veronii-51 | gyrB51  | KJ747146 | rpoB45* | KJ775032 | <i>A. veronii</i>                    | <i>A. hydrophila</i> |
| DK-A.veronii-52 | gyrB52  | KJ747147 | rpoB52  | KJ747181 | <i>A. veronii</i>                    | <i>A. hydrophila</i> |

|                           |         |          |         |          |                   |                   |
|---------------------------|---------|----------|---------|----------|-------------------|-------------------|
| DK-A.caviae-53            | gyrB53  | KJ747148 | rpoB16* | KJ775031 | <i>A. caviae</i>  | <i>A. caviae</i>  |
| DK-A.media-54             | gyrB54* | KJ747149 | rpoB54* | KJ747182 | <i>A. media</i>   | <i>A. caviae</i>  |
| DK-A.media-57             | gyrB57  | KJ747150 | rpoB57  | KJ747183 | <i>A. media</i>   | <i>A. caviae</i>  |
| DK-A.caviae-58            | gyrB58  | KJ747151 | rpoB58  | KJ747184 | <i>A. caviae</i>  | <i>A. caviae</i>  |
| DK-A.veronii-59           | gyrB59  | KJ747152 | rpoB59  | KJ747185 | <i>A. veronii</i> | <i>A. veronii</i> |
| DK-A.caviae-60            | gyrB60  | KJ747153 | rpoB10* | KJ747163 | <i>A. caviae</i>  | <i>A. caviae</i>  |
| DK-A.media-63             | gyrB63  | KJ747154 | rpoB54* | KJ747182 | <i>A. media</i>   | <i>A. caviae</i>  |
| DK-A.media-64             | gyrB64  | KJ747155 | rpoB64  | KJ747186 | <i>A. media</i>   | <i>A. caviae</i>  |
| DK-A.media-65             | gyrB54* | KJ747149 | rpoB65  | KJ747187 | <i>A. media</i>   | <i>A. caviae</i>  |
| DK-A.caviae-66            | gyrB66  | KJ747156 | rpoB19* | KJ747167 | <i>A. caviae</i>  | <i>A. caviae</i>  |
| Number of unique sequence | 48      |          | 33      |          |                   |                   |

\*) indicate sequences being identical to other sequence
